# Supplementary material for: Ozone and DNA active UV radiation changes for the near global mean and at high latitudes due to enhanced greenhouse gas concentrations
Source: Copernicus journal article supplement (doi:10.5194/egusphere-2022-87), 2022-04-19

# Ozone and DNA active UV radiation changes for the near global mean and at high latitudes due to enhanced greenhouse gas concentrations

Kostas Eleftheratos<sup>1,2</sup>, John Kapsomenakis<sup>3</sup>, Ilias Fountoulakis<sup>4,5</sup>, Christos S. Zerefos<sup>2,3,6</sup>, Patrick Jöckel<sup>7</sup>, Martin Dameris<sup>7</sup>, Alkiviadis F. Bais<sup>8</sup>, Germar Bernhard<sup>9</sup>, Dimitra Kouklaki<sup>1</sup>, Kleareti Tourpali<sup>8</sup>, Scott Stierle<sup>10</sup>, J. Ben Liley<sup>11</sup>, Colette Brogniez<sup>12</sup>, Frédérique Auriol<sup>12</sup>, Henri Diémoz<sup>5</sup>, Stana Simic<sup>13</sup>, Irina Petropavlovskikh<sup>14</sup>

<sup>1</sup>Department of Geology and Geoenvironment, National and Kapodistrian University of Athens, Athens, Greece

<sup>2</sup>Center for Environmental Effects on Health, Biomedical Research Foundation of the Academy of Athens, Athens, Greece

<sup>3</sup>Research Centre for Atmospheric Physics and Climatology, Academy of Athens, Athens, Greece

<sup>4</sup>Institute for Astronomy, Astrophysics, Space Applications and Remote Sensing, National Observatory of Athens (IAASARS/NOA), Athens, Greece

<sup>5</sup>Aosta Valley Regional Environmental Protection Agency (ARPA), Saint-Christophe, Italy

<sup>6</sup>Navarino Environmental Observatory (N.E.O), Messenia, Greece

<sup>7</sup>Deutsches Zentrum für Luft- und Raumfahrt, Institut für Physik der Atmosphäre, Oberpfaffenhofen, Germany

<sup>8</sup>Department of Physics, Aristotle University of Thessaloniki, Thessaloniki, Greece

<sup>9</sup>Biospherical Instruments Inc., San Diego, CA 92110, USA

<sup>10</sup>NOAA Global Monitoring Laboratory, Boulder, CO 80305, USA

<sup>11</sup>National Institute of Water & Atmospheric Research (NIWA), Lauder, New Zealand

<sup>12</sup>Univ. Lille, CNRS, UMR 8518 - Laboratoire d'Optique Atmosphérique, F-59000 Lille, France

<sup>13</sup>Institute for Meteorology and Climatology, University of Natural Resources and Life Sciences, Vienna 1180, Austria

<sup>14</sup>Cooperative Institute for Research in Environmental Sciences, University of Colorado, Boulder, CO, USA

*Correspondence to:* Kostas Eleftheratos (kelef@geol.uoa.gr)

**Table S1.** Statistics of correlations between modelled (EMAC CCM “specified dynamics” simulation SC1SD-base-02) and observed (ground-based) DNA active irradiance data after removing variability related to the seasonal cycle. Stations are listed from north to south.

| Station                                | Latitude | Correlation | Intercept (%) | Slope   | Error   | t-value  | p-value    | N   |
|----------------------------------------|----------|-------------|---------------|---------|---------|----------|------------|-----|
| Summit, Greenland                      | 72.58    | 0.70942     | -0.63182      | 0.75691 | 0.08109 | 9.33455  | <0.0001    | 88  |
| Barrow, AK, United States              | 71.32    | 0.34199     | 0.23804       | 0.68041 | 0.18074 | 3.76456  | 2.72957E-4 | 109 |
| Villeneuve d’Ascq, France              | 50.61    | 0.69524     | -0.7477       | 0.87007 | 0.07089 | 12.27297 | <0.0001    | 163 |
| Groß-Enzersdorf, Austria               | 48.20    | 0.58206     | -1.04209      | 0.64811 | 0.06711 | 9.65676  | <0.0001    | 184 |
| Zugspitze, Germany                     | 47.42    | 0.2659      | 1.13542       | 0.2448  | 0.1281  | 1.91101  | 0.06198    | 50  |
| Hoher Sonnblick, Austria               | 47.05    | 0.67287     | 1.11524       | 0.94558 | 0.07542 | 12.53774 | <0.0001    | 192 |
| Aosta, Italy                           | 45.74    | 0.67091     | -1.23967      | 1.33004 | 0.14016 | 9.48924  | <0.0001    | 112 |
| Observatoire de Haute Provence, France | 43.94    | 0.57419     | -2.10876      | 0.72899 | 0.10447 | 6.97814  | <0.0001    | 101 |
| Thessaloniki, Greece                   | 40.63    | 0.61157     | -0.65425      | 0.76343 | 0.06984 | 10.93159 | <0.0001    | 202 |
| Boulder, CO, United States             | 39.99    | 0.74751     | 0.19874       | 0.67683 | 0.0474  | 14.2792  | <0.0001    | 163 |
| Athens, Greece                         | 37.99    | 0.46825     | -1.20784      | 0.31889 | 0.05141 | 6.20271  | <0.0001    | 139 |
| Mauna Loa, HI, United States           | 19.53    | 0.57692     | 0.35833       | 0.50906 | 0.04962 | 10.25995 | <0.0001    | 213 |
| Reunion Island, St. Denis, France      | -20.90   | 0.29475     | -0.01221      | 0.23706 | 0.09532 | 2.48686  | 0.01546    | 67  |
| Alice Springs, Australia               | -23.80   | 0.59268     | -0.13242      | 0.60587 | 0.0691  | 8.7686   | <0.0001    | 144 |
| Lauder, New Zealand                    | -45.04   | 0.52901     | 0.08797       | 0.84026 | 0.09301 | 9.03374  | <0.0001    | 212 |
| Ushuaia, Argentina                     | -54.82   | 0.44285     | -0.63202      | 0.79185 | 0.21234 | 3.72909  | 4.44141E-4 | 59  |
| Palmer, Antarctica                     | -64.77   | 0.4665      | -0.09991      | 0.71651 | 0.12103 | 5.92008  | <0.0001    | 128 |
| Arrival Heights, Antarctica            | -77.83   | 0.93868     | 0.53114       | 0.99985 | 0.03298 | 30.31727 | <0.0001    | 126 |
| South Pole, Antarctica                 | -90      | 0.94832     | -0.20478      | 1.04666 | 0.03238 | 32.32625 | <0.0001    | 119 |



**Table S3.** Statistics of correlations between modelled (EMAC CCM “specified dynamics” simulation SC1SD-base-02) and observed (satellite MODIS/Terra) cloudiness data after removing variability related to the seasonal cycle. Stations are listed from north to south.

| Station                                | Latitude | Correlation | Intercept (%) | Slope    | Error   | t-value  | p-value | N   |
|----------------------------------------|----------|-------------|---------------|----------|---------|----------|---------|-----|
| Summit, Greenland                      | 72.58    | 0.19614     | 0.01033       | 0.06936  | 0.03053 | 2.2719   | 0.02475 | 131 |
| Barrow, AK, United States              | 71.32    | 0.59746     | 0.01835       | 0.75521  | 0.08925 | 8.46216  | <0.0001 | 131 |
| Villeneuve d’Ascq, France              | 50.61    | 0.5155      | -0.0936       | 0.50165  | 0.05622 | 8.92306  | <0.0001 | 222 |
| Groß-Enzersdorf, Austria               | 48.20    | 0.65362     | -0.15377      | 0.61759  | 0.04821 | 12.80986 | <0.0001 | 222 |
| Zugspitze, Germany                     | 47.42    | 0.54779     | -0.02613      | 0.57172  | 0.05887 | 9.71188  | <0.0001 | 222 |
| Hoher Sonnblick, Austria               | 47.05    | 0.55629     | -0.04129      | 0.61867  | 0.06231 | 9.92925  | <0.0001 | 222 |
| Aosta, Italy                           | 45.74    | 0.66827     | -0.06953      | 0.68816  | 0.05165 | 13.3242  | <0.0001 | 222 |
| Observatoire de Haute Provence, France | 43.94    | 0.44998     | -0.07471      | 0.45353  | 0.06068 | 7.4736   | <0.0001 | 222 |
| Thessaloniki, Greece                   | 40.63    | 0.64131     | -0.8916       | 0.86816  | 0.07084 | 12.2556  | <0.0001 | 217 |
| Boulder, CO, United States             | 39.99    | 0.53923     | -0.09291      | 0.48194  | 0.05075 | 9.49717  | <0.0001 | 222 |
| Athens, Greece                         | 37.99    | 0.48522     | -1.26658      | 0.68926  | 0.08592 | 8.02237  | <0.0001 | 211 |
| Mauna Loa, HI, United States           | 19.53    | 0.592       | -1.20988      | 1.35496  | 0.1258  | 10.77071 | <0.0001 | 217 |
| Reunion Island, St. Denis, France      | -20.90   | 0.52781     | -1.53877      | 1.18482  | 0.12943 | 9.15397  | <0.0001 | 219 |
| Alice Springs, Australia               | -23.80   | 0.62268     | -0.25621      | 0.58451  | 0.05233 | 11.16931 | <0.0001 | 199 |
| Lauder, New Zealand                    | -45.04   | 0.3935      | 0.07335       | 0.45073  | 0.071   | 6.34872  | <0.0001 | 222 |
| Ushuaia, Argentina                     | -54.82   | 0.44364     | -0.09417      | 0.60317  | 0.10855 | 5.55661  | <0.0001 | 128 |
| Palmer, Antarctica                     | -64.77   | 0.47323     | 0.00415       | 0.55019  | 0.09124 | 6.02995  | <0.0001 | 128 |
| Arrival Heights, Antarctica            | -77.83   | 0.53671     | 0.28879       | 0.94892  | 0.1329  | 7.14     | <0.0001 | 129 |
| South Pole, Antarctica                 | -90      | -0.17482    | -0.14172      | -0.04717 | 0.02467 | -1.91231 | 0.0583  | 118 |

# Summit, Greenland

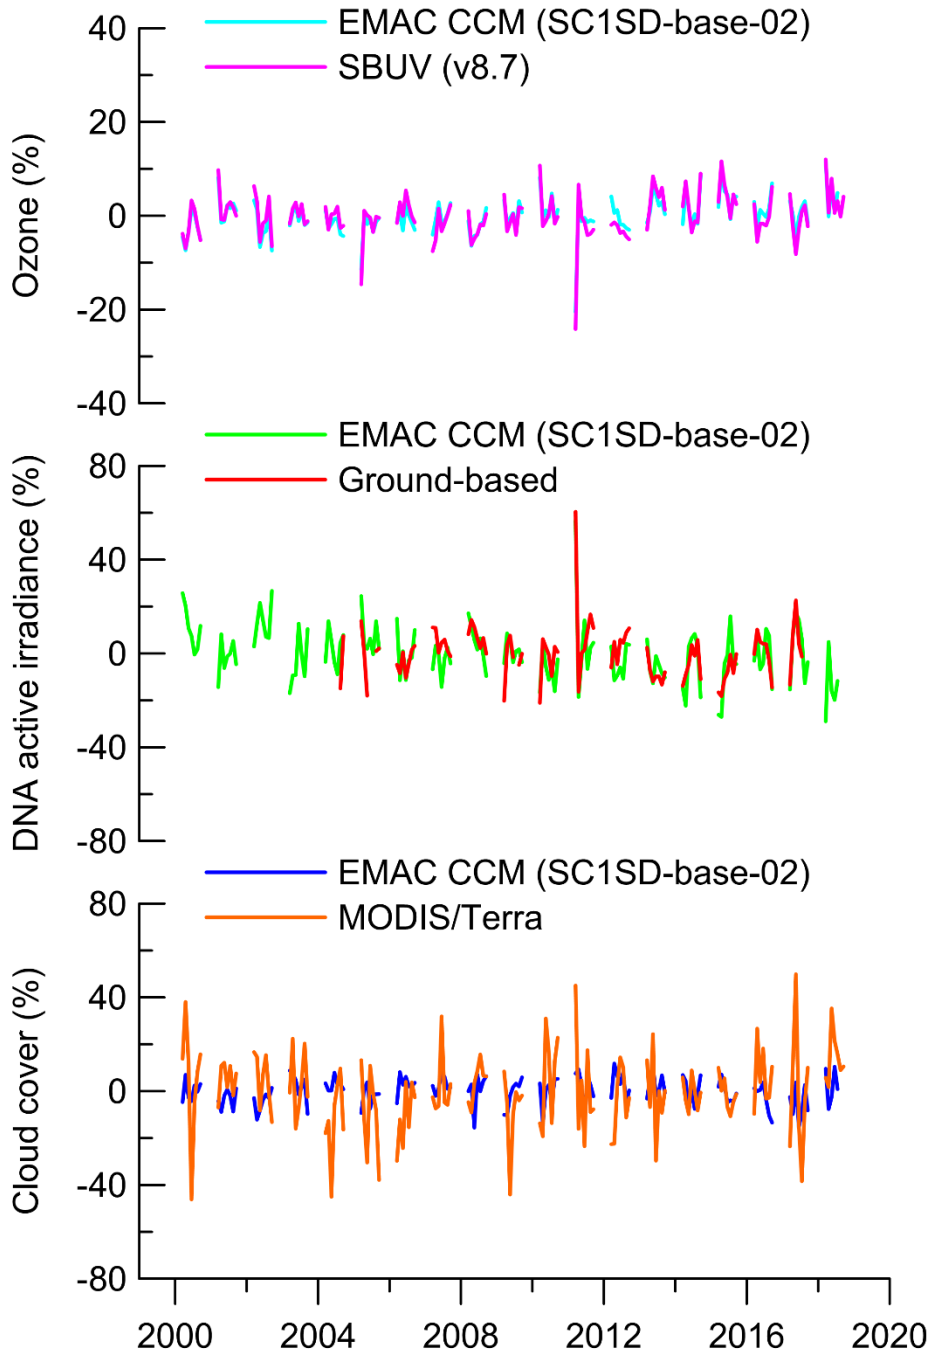

# Barrow, AK, United States

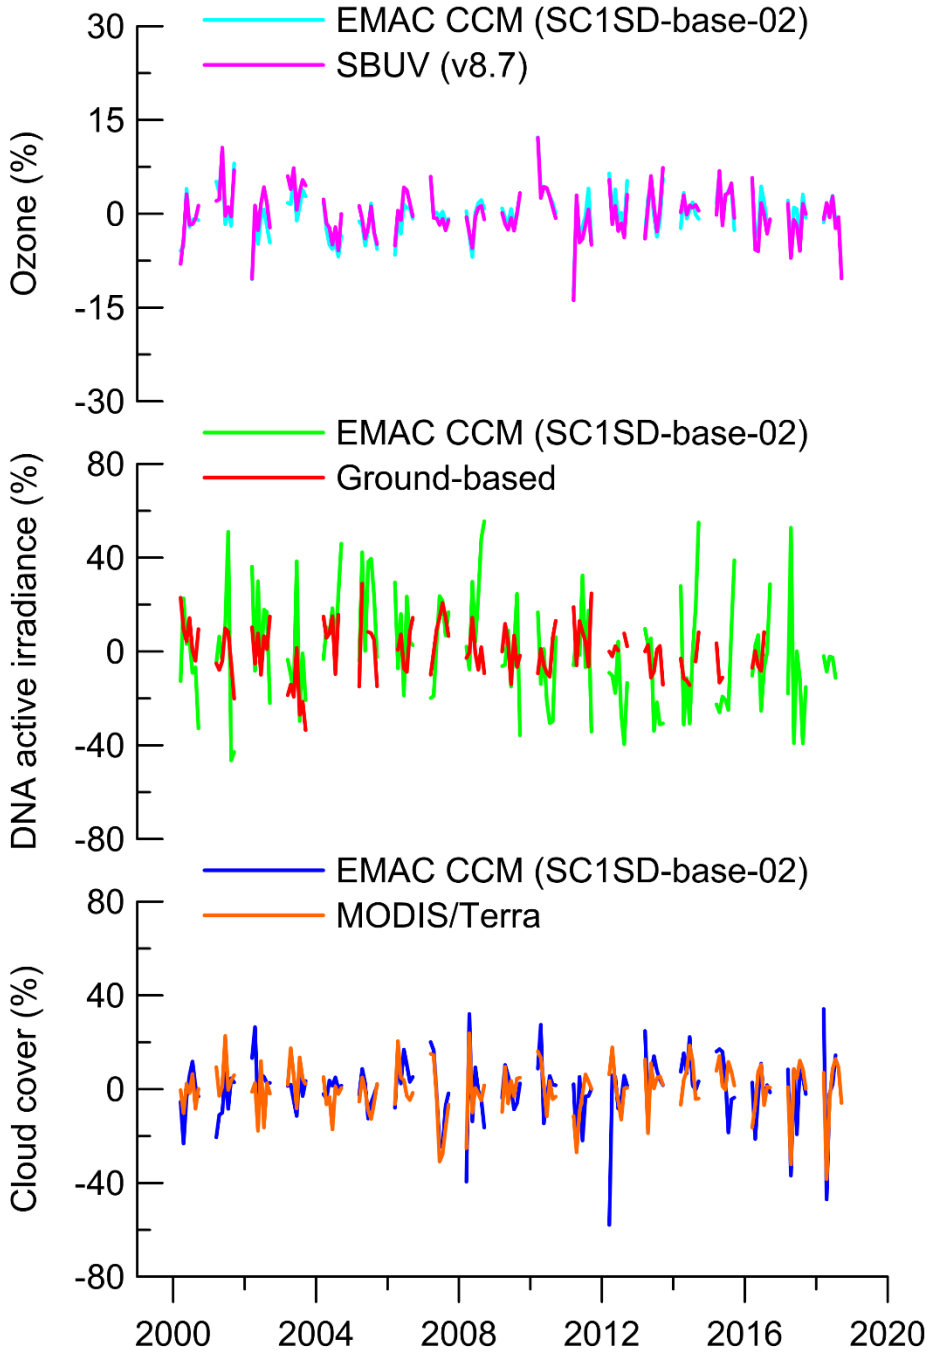

# Villeneuve d'Ascq, France

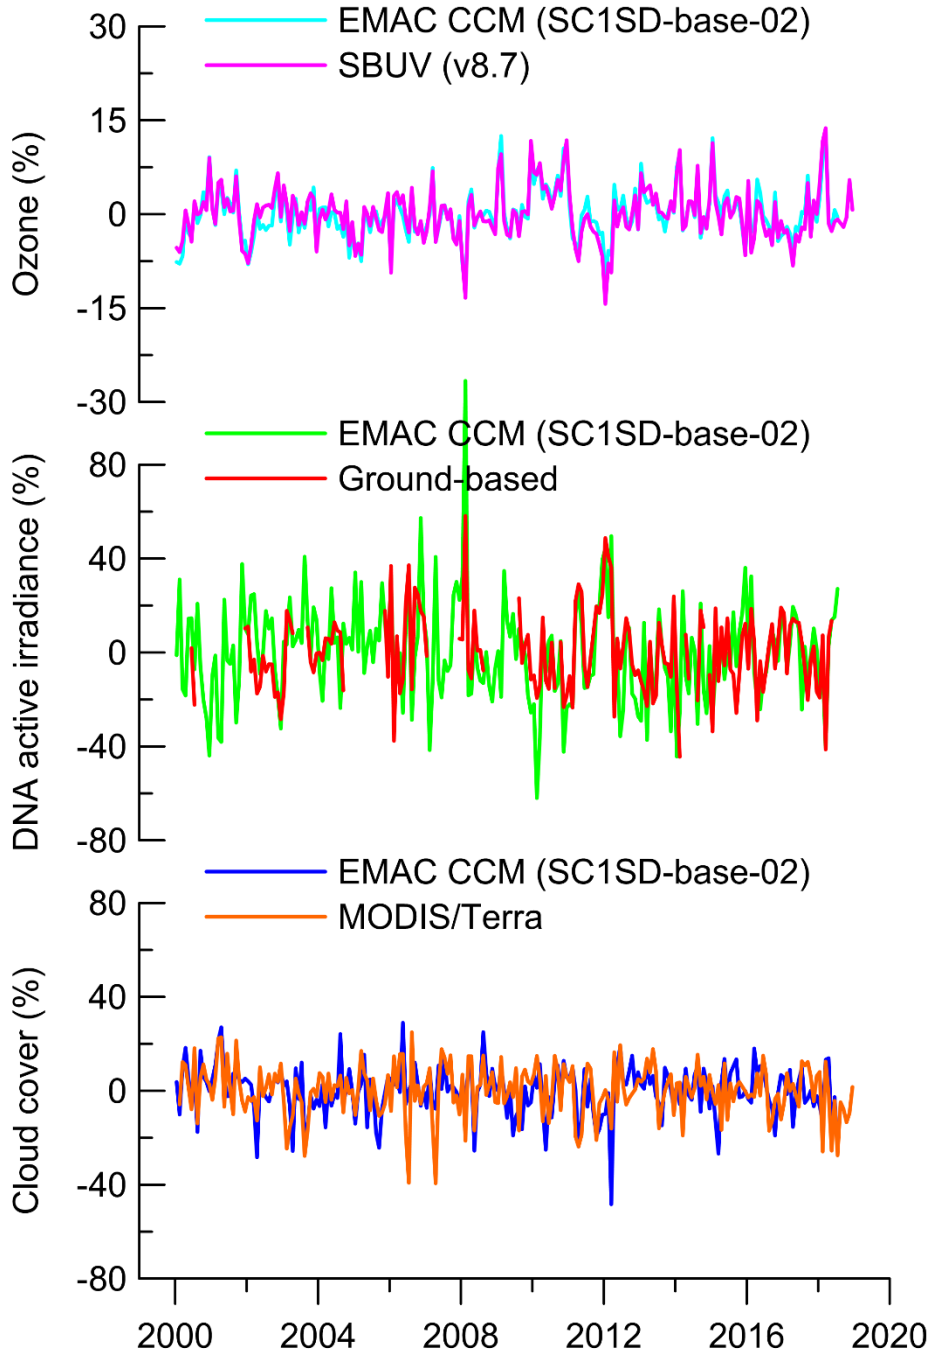

# Groß-Enzersdorf, Austria

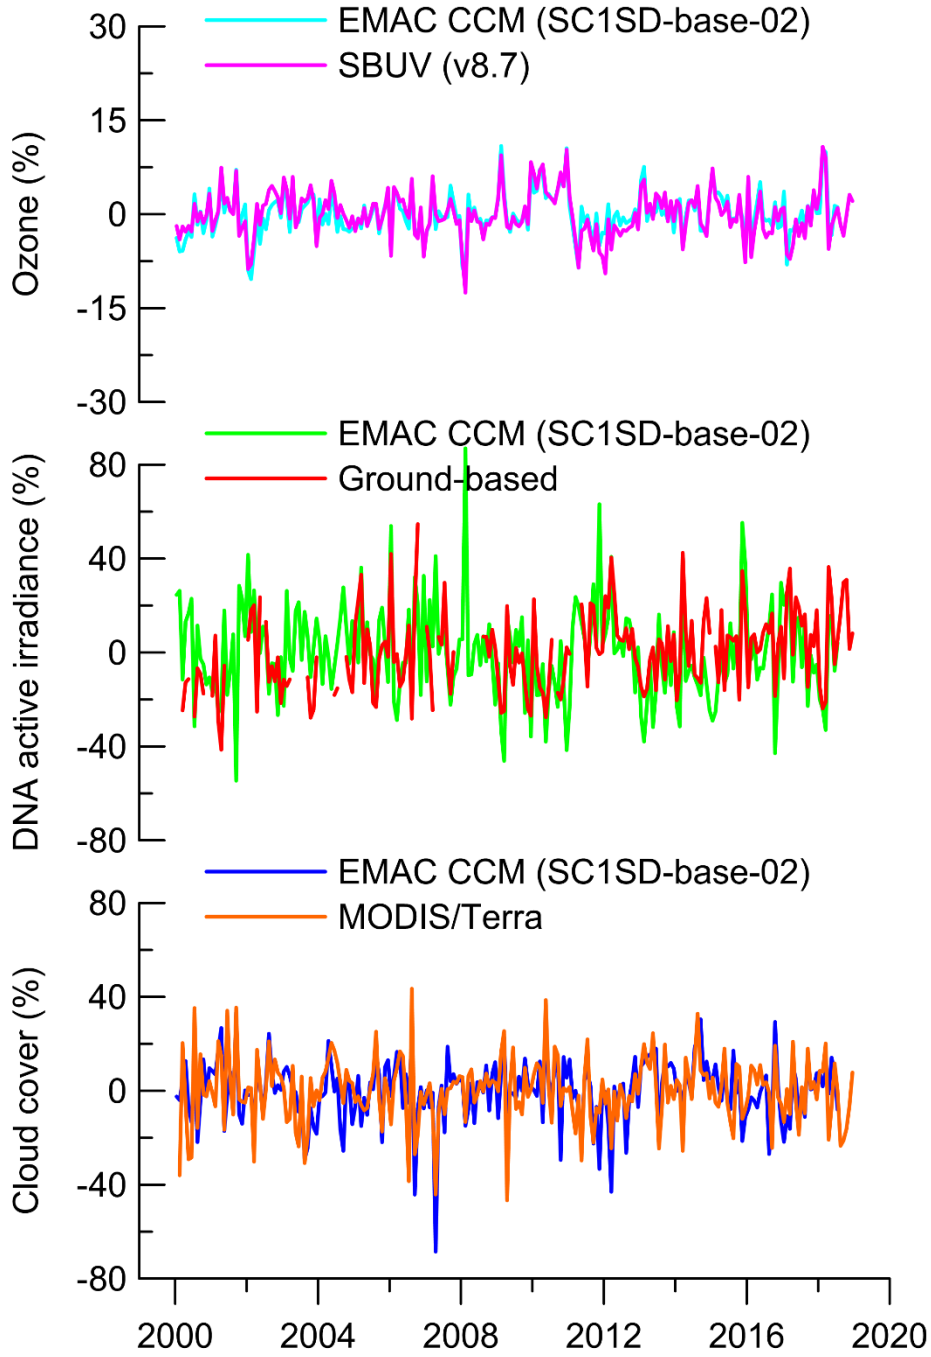



# Zugspitze, Germany

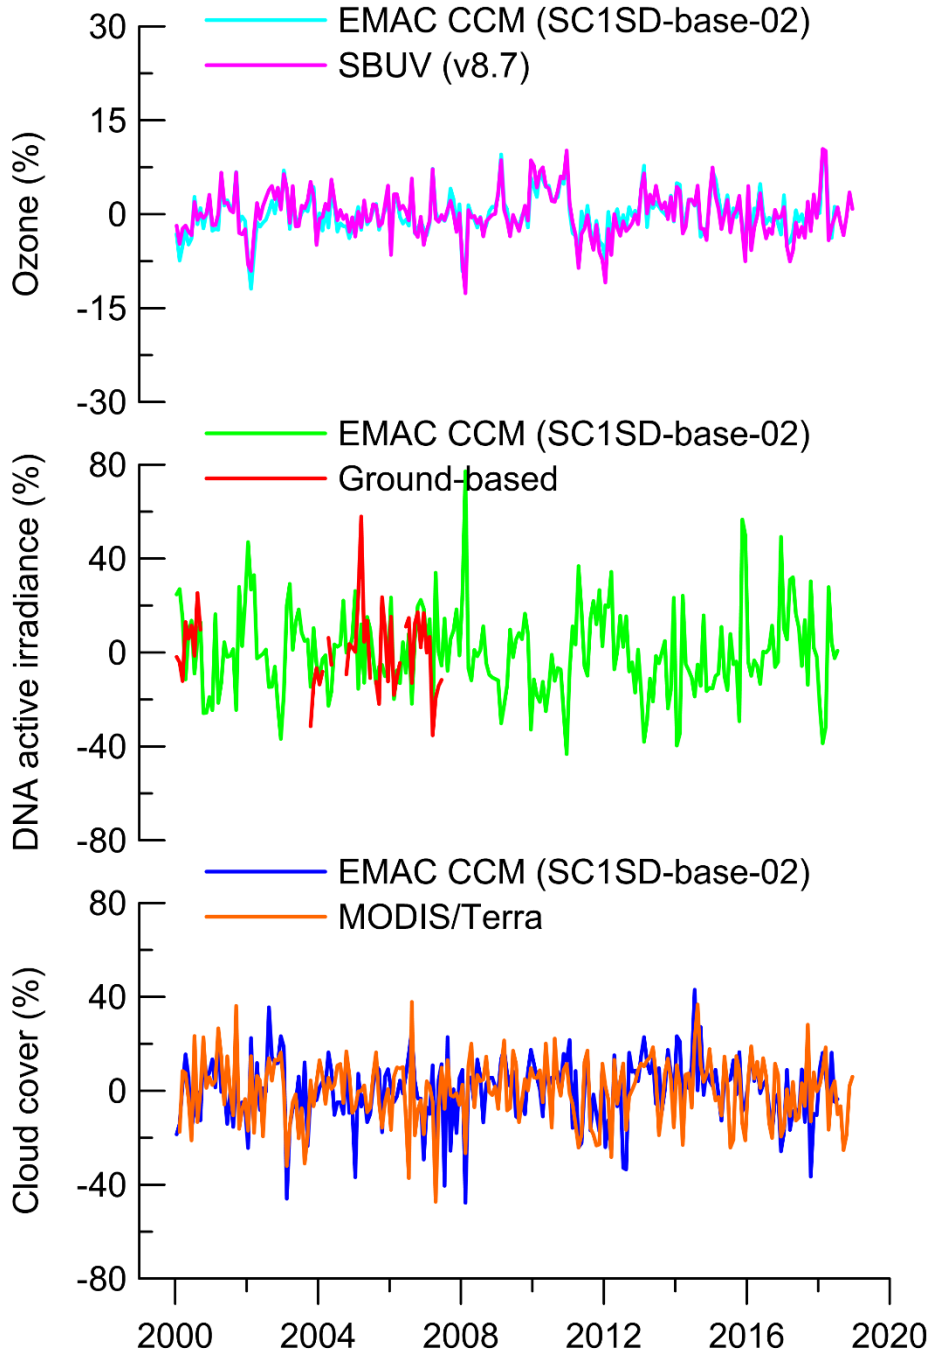

# Hoher Sonnblick, Austria

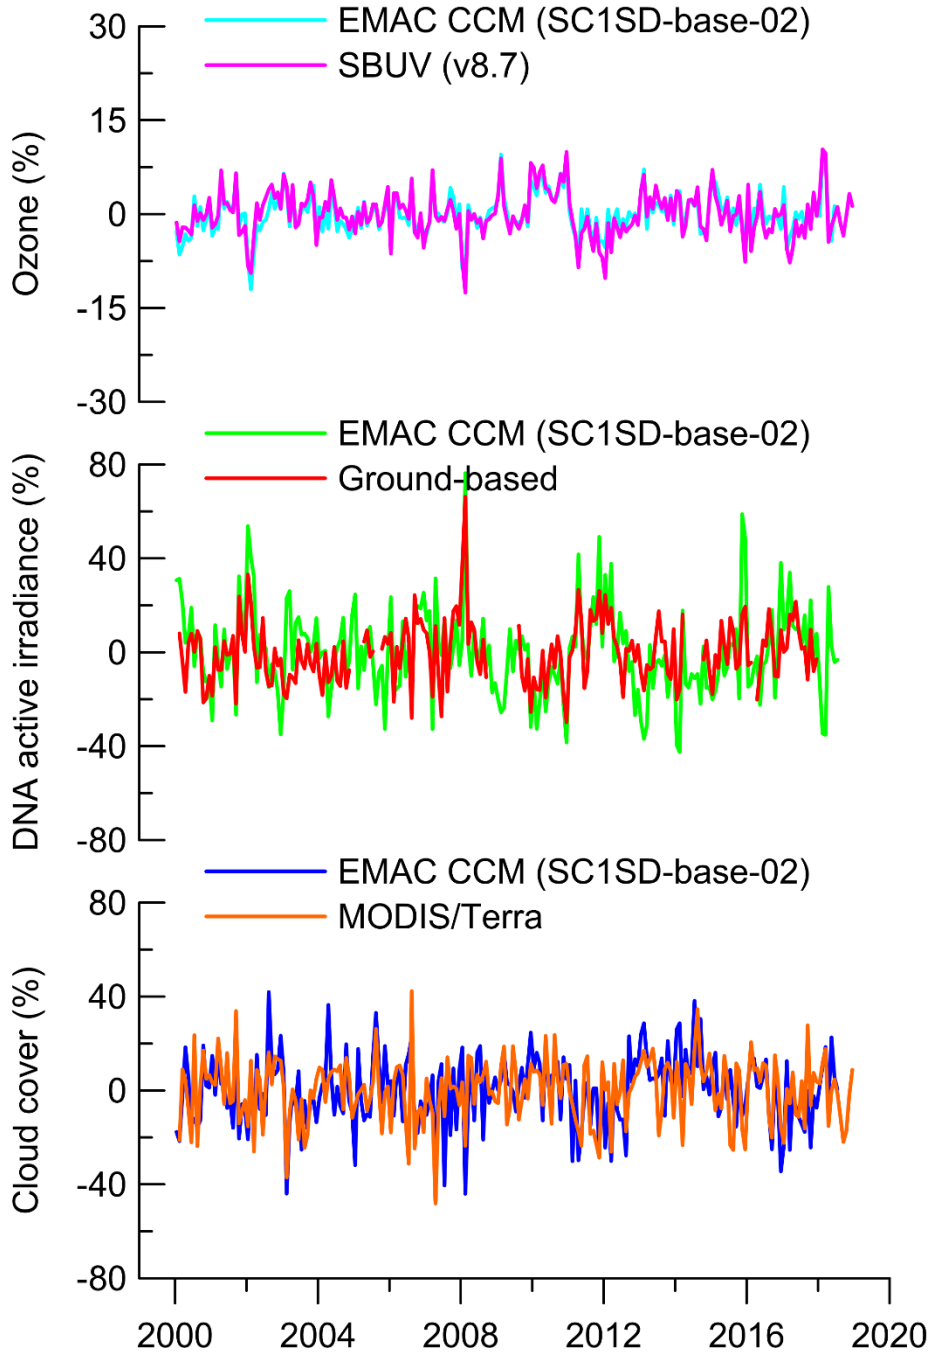

# Aosta, Italy

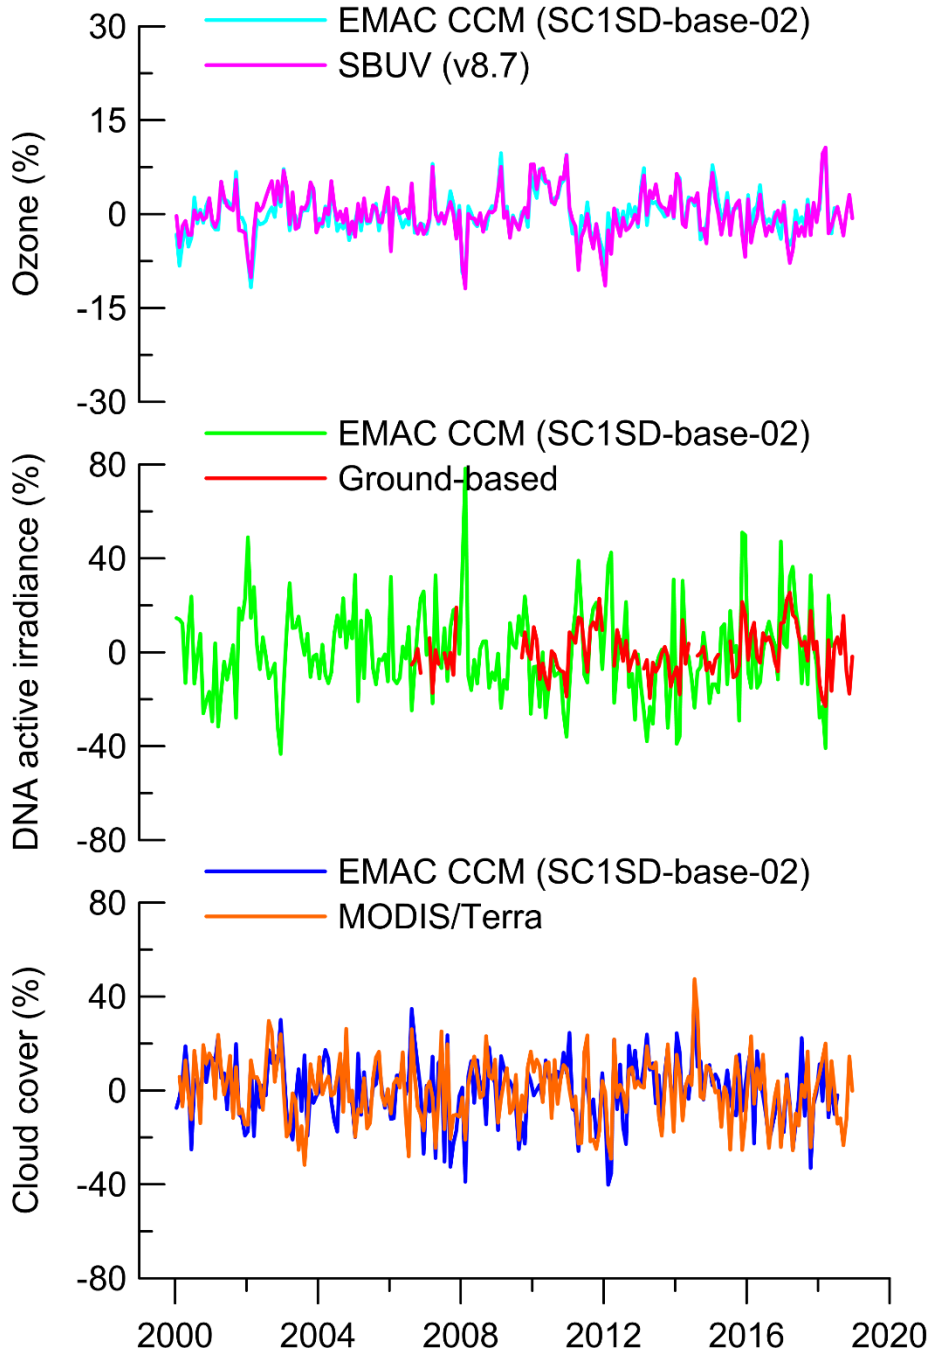

# Observatoire de Haute Provence, France

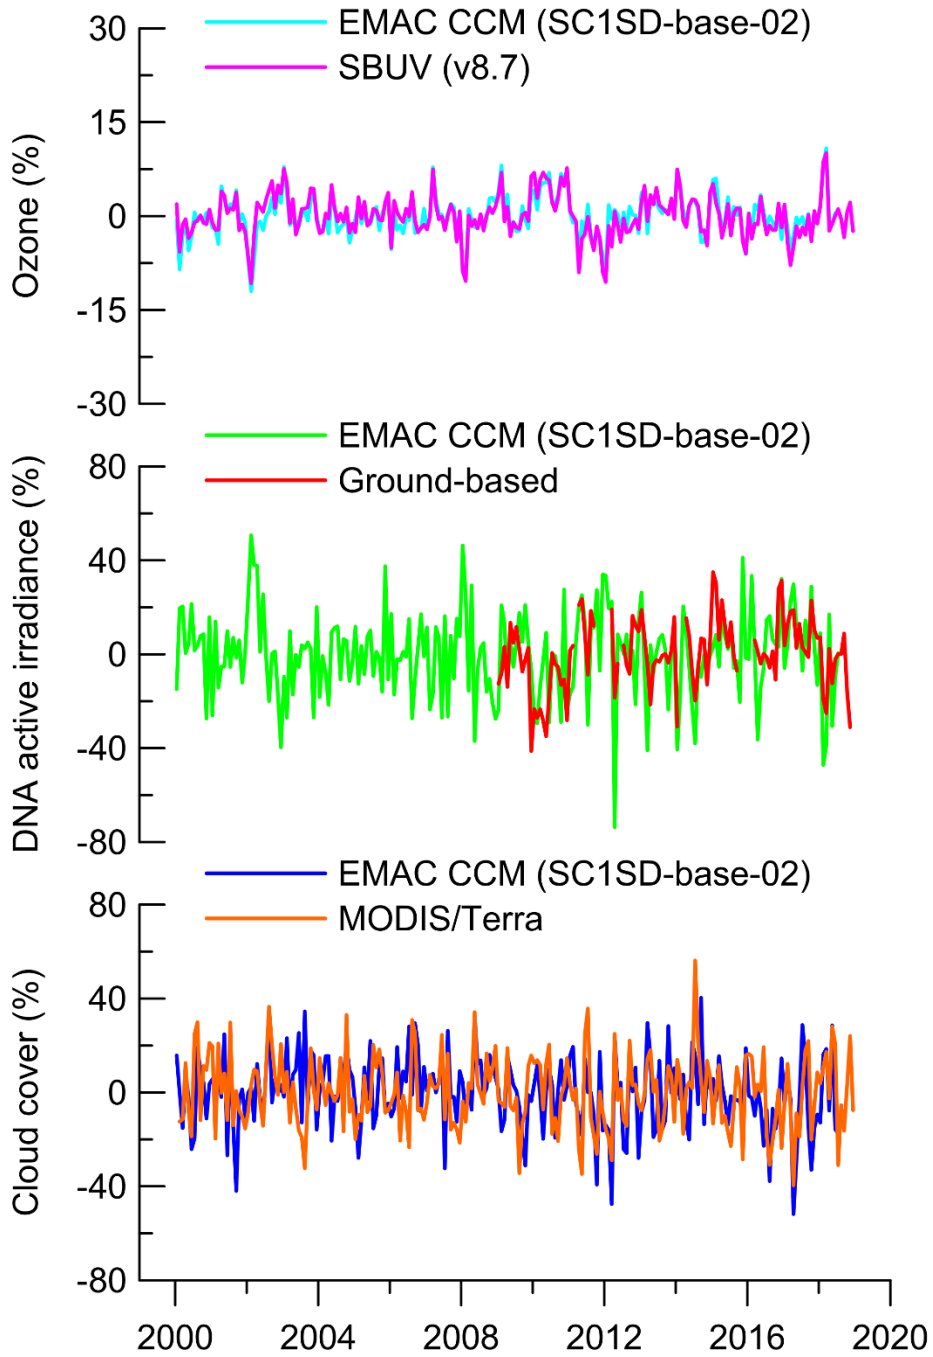

# Thessaloniki, Greece

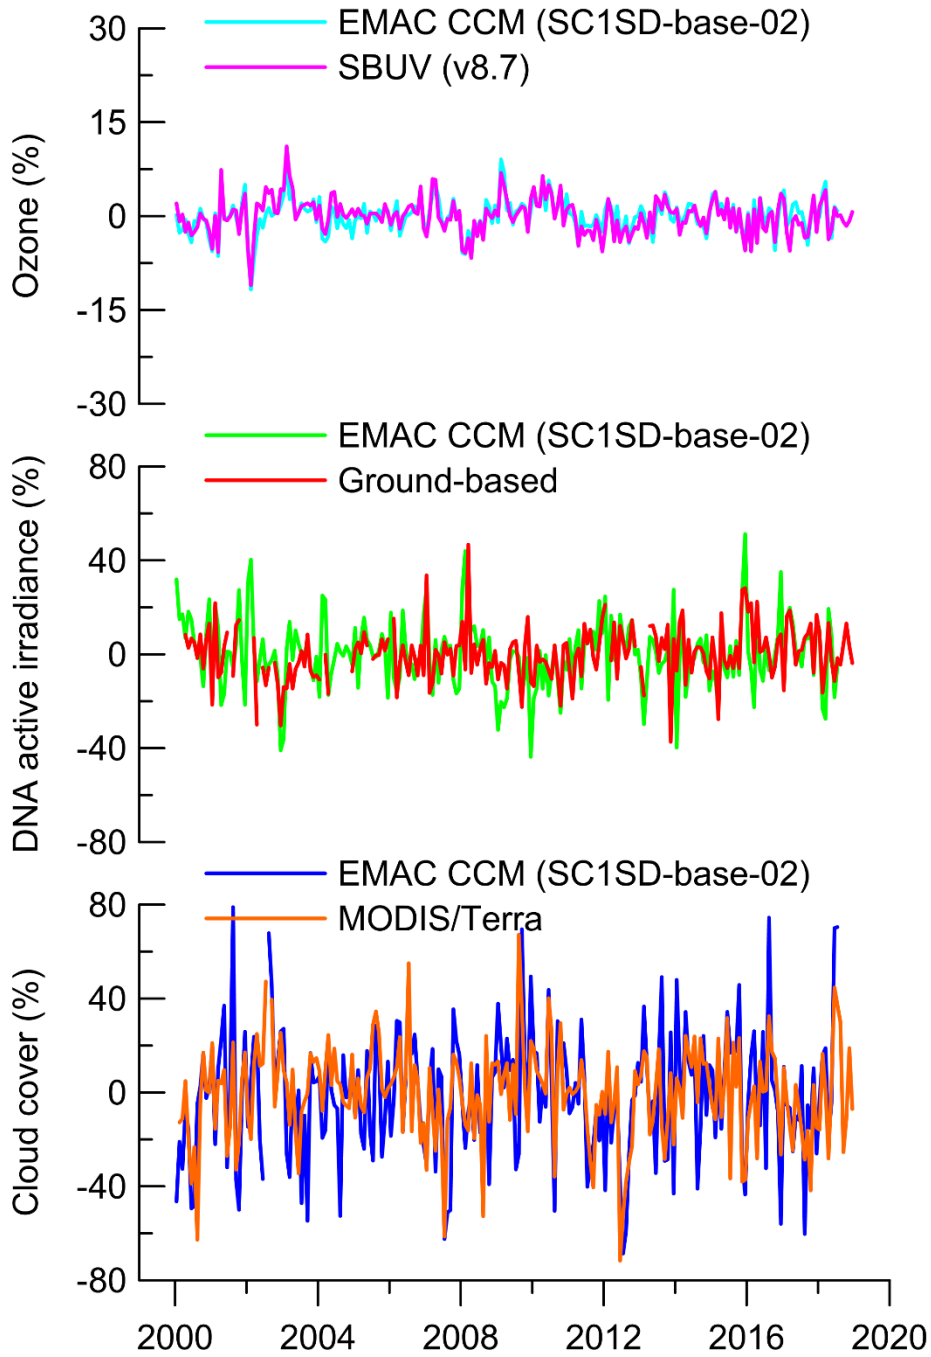

# Boulder, CO, United States

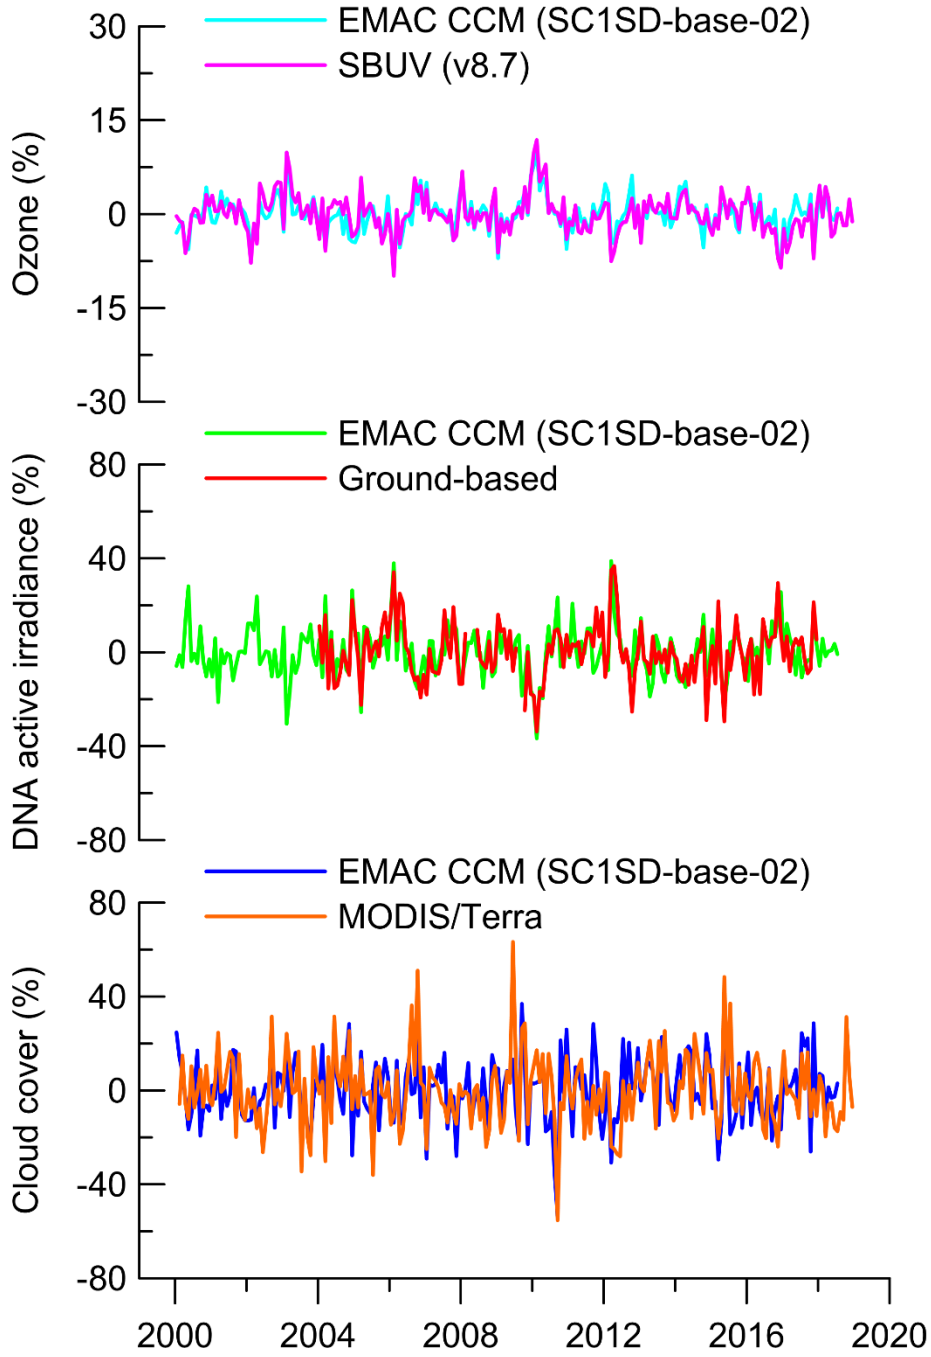

# Athens, Greece

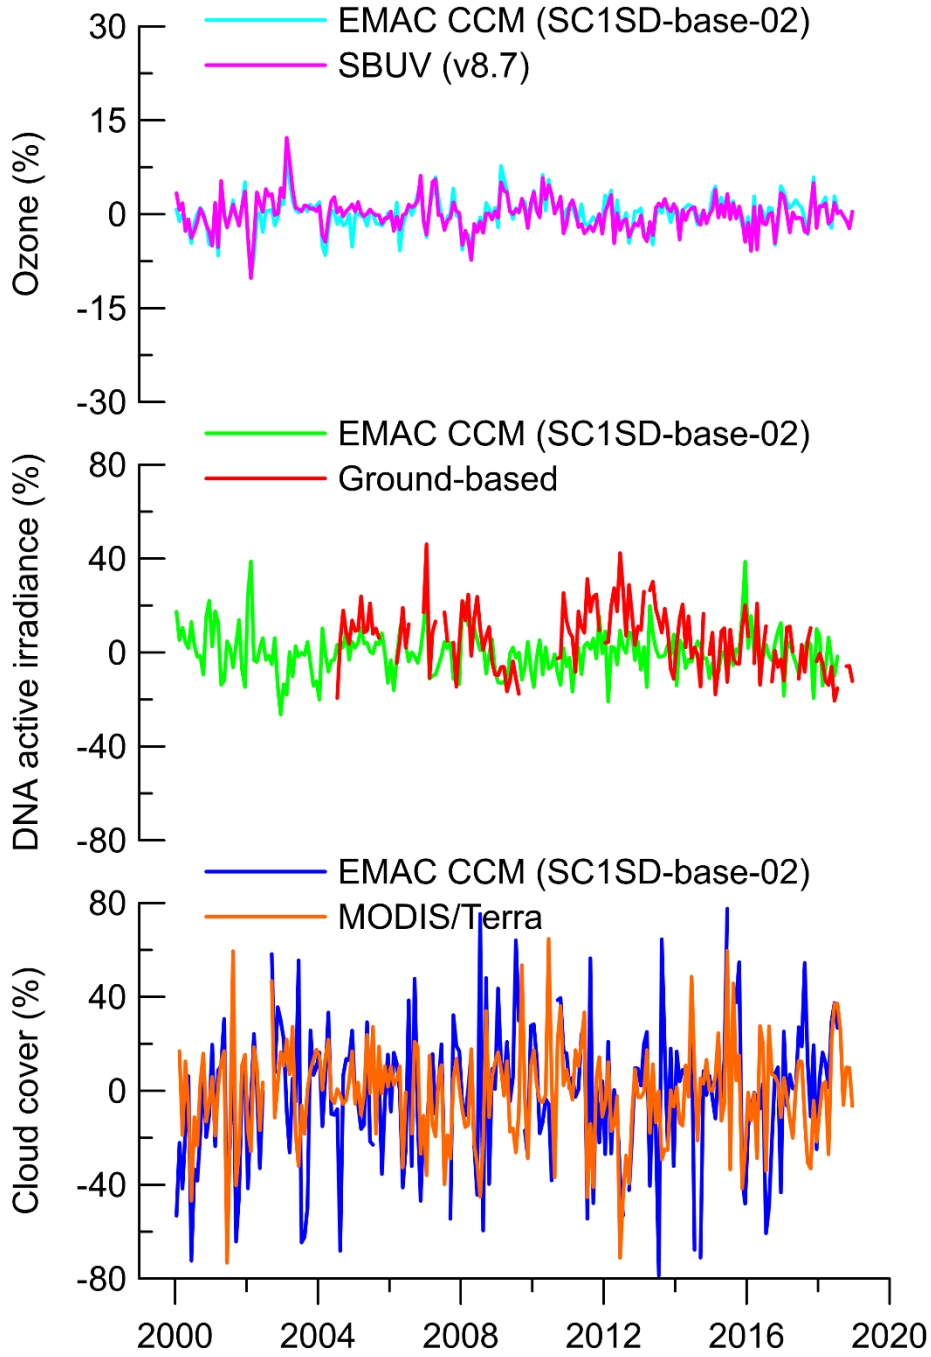

# Mauna Loa, HI, United States

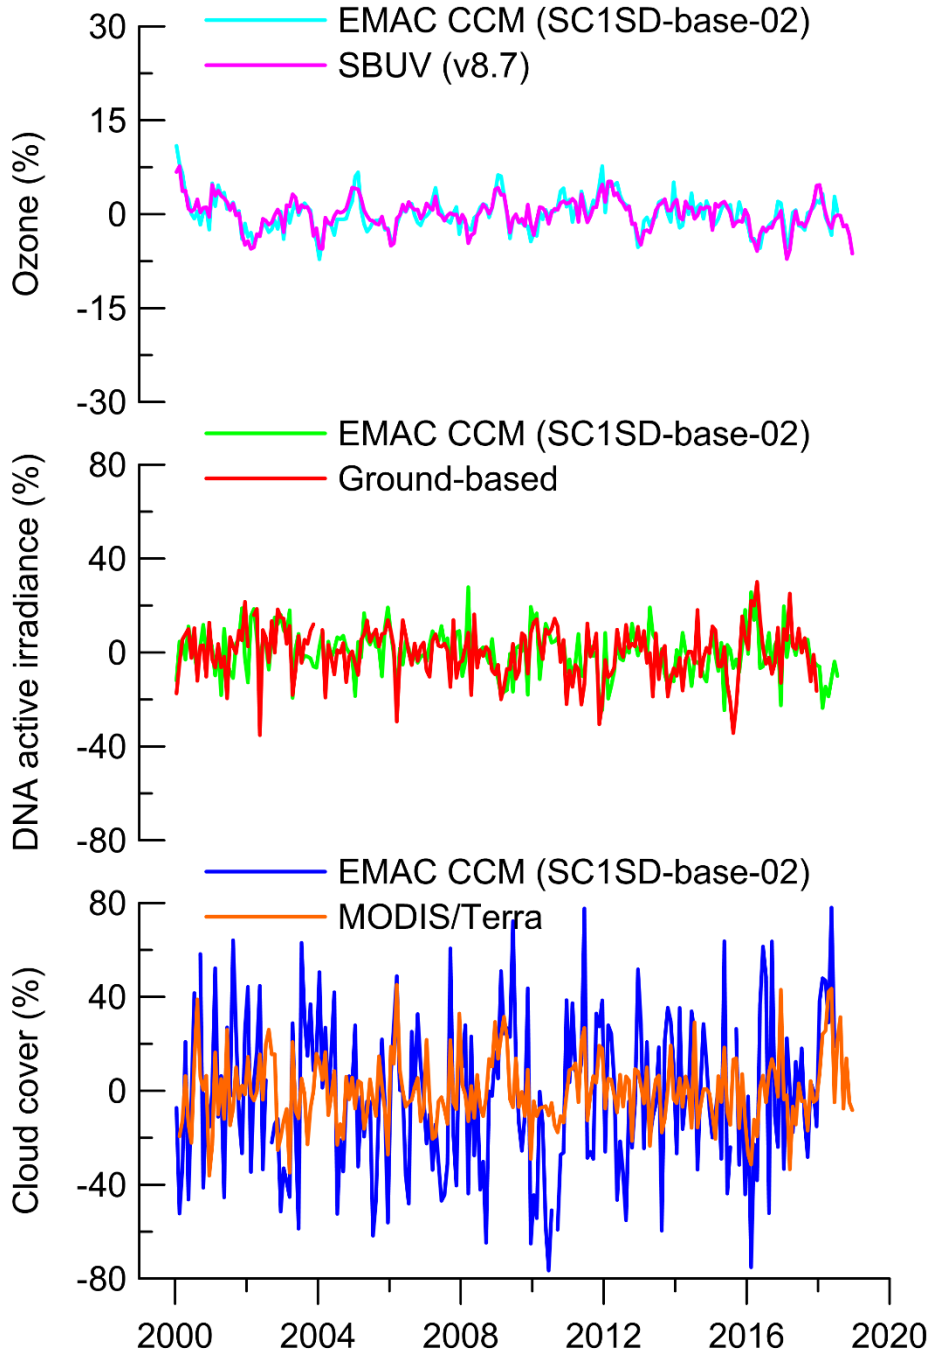



# Reunion Island, St. Denis, France

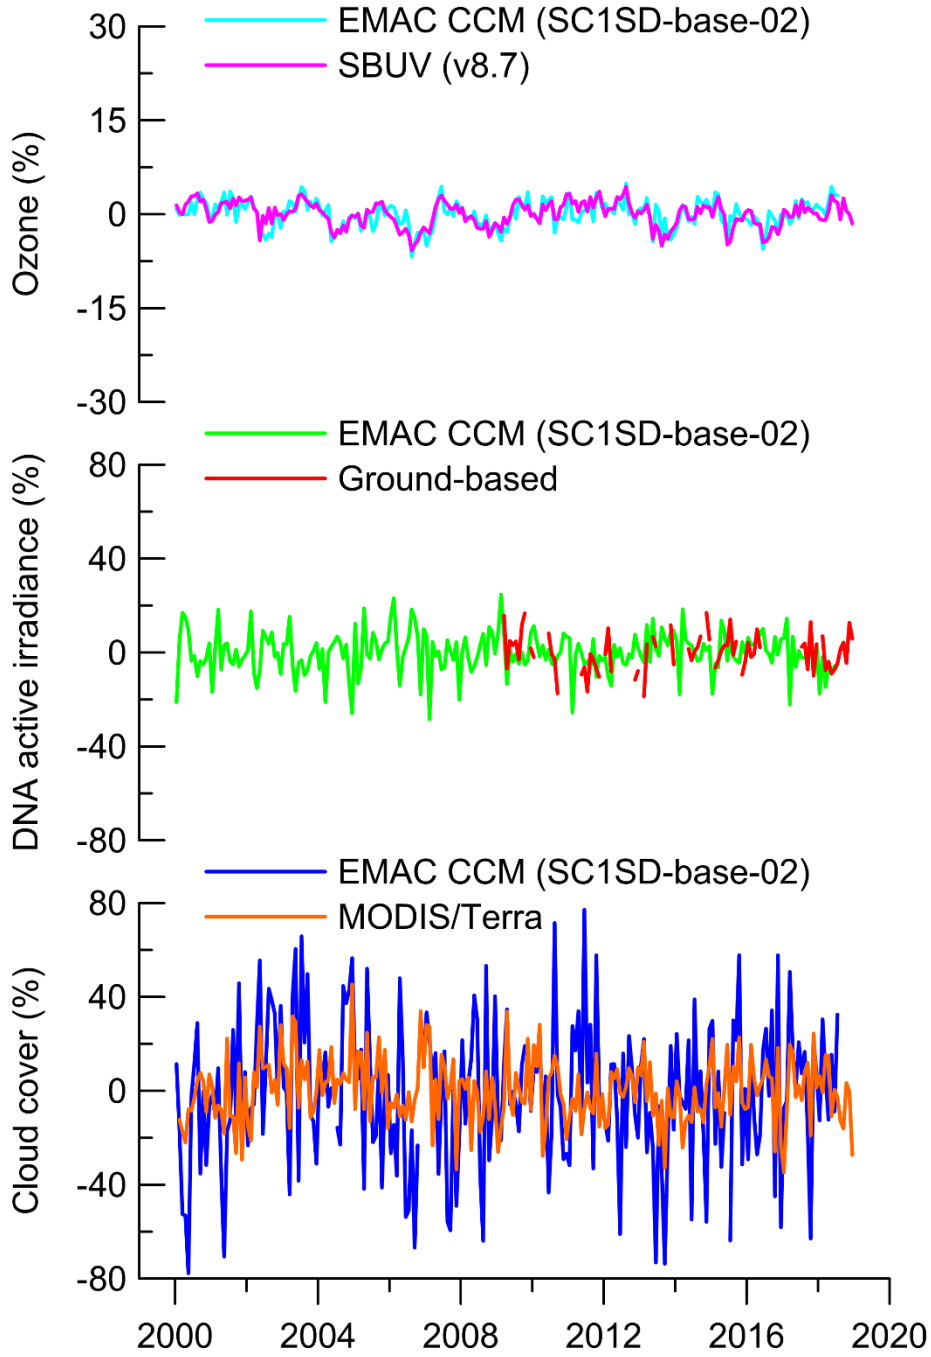

# Alice Springs, Australia

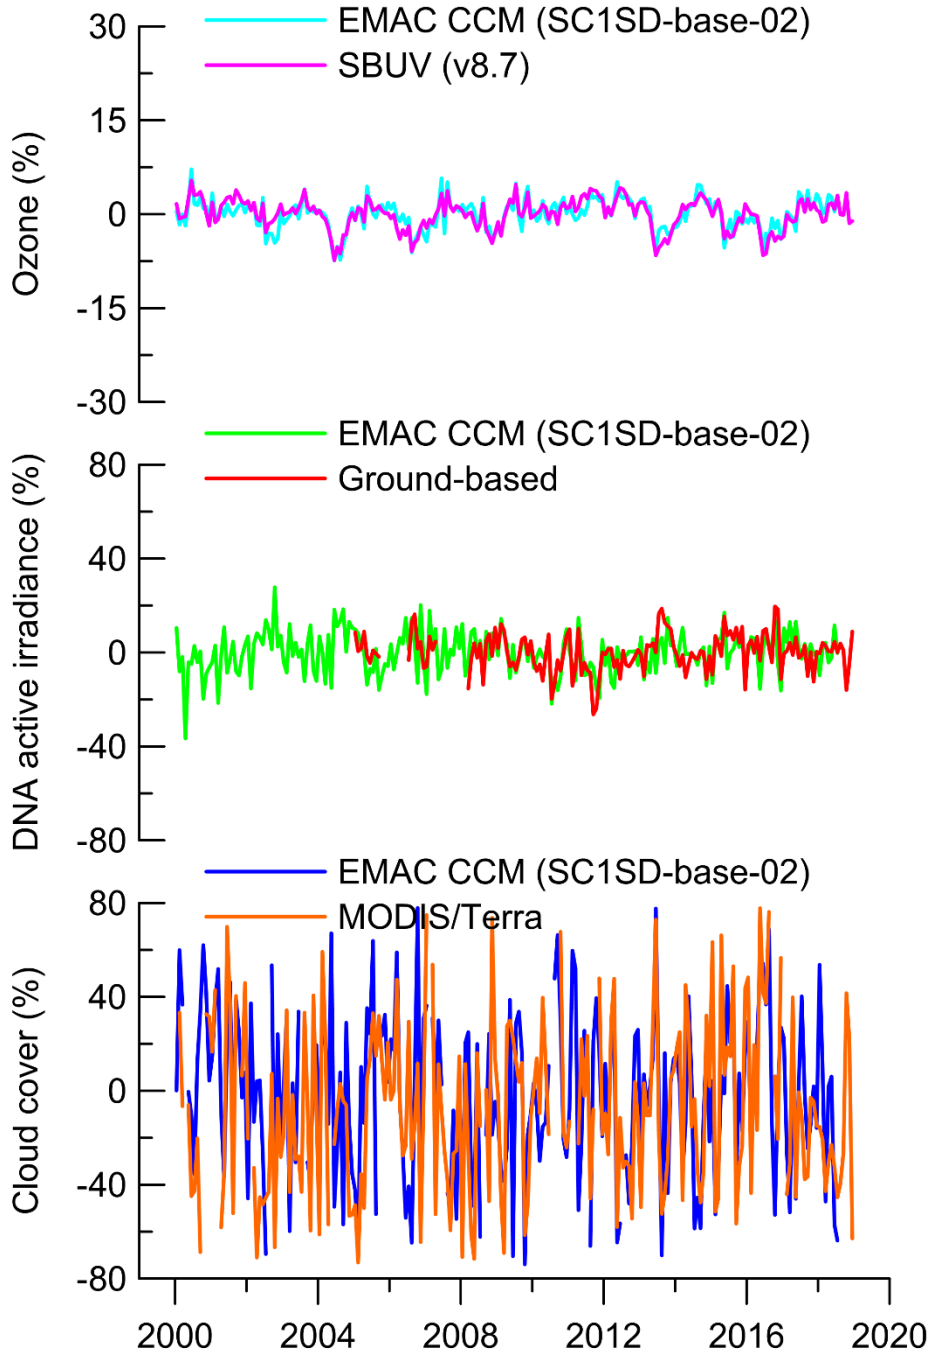

# Lauder, New Zealand

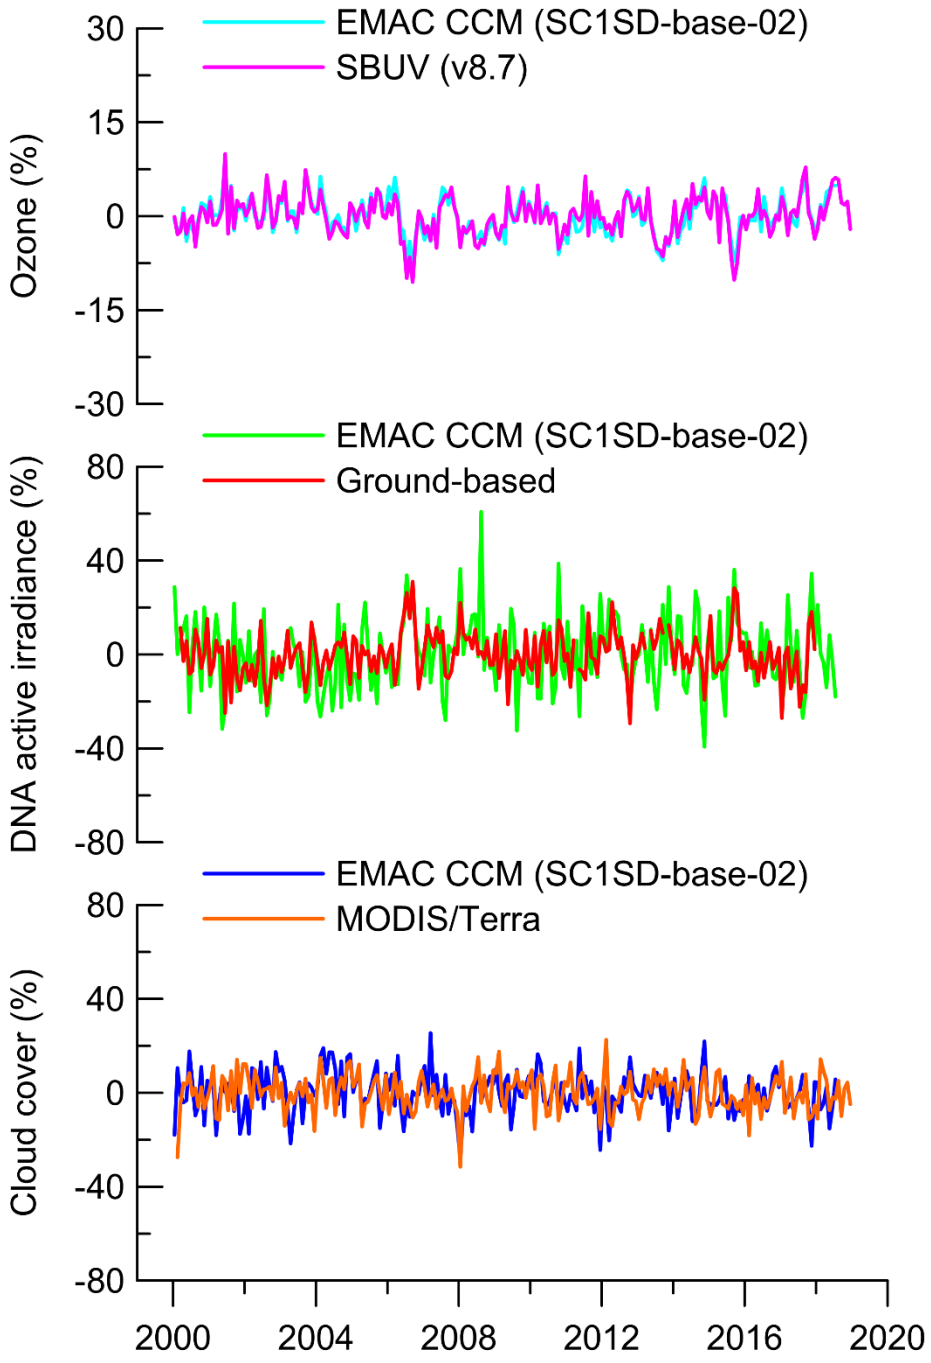

# Ushuaia, Argentina

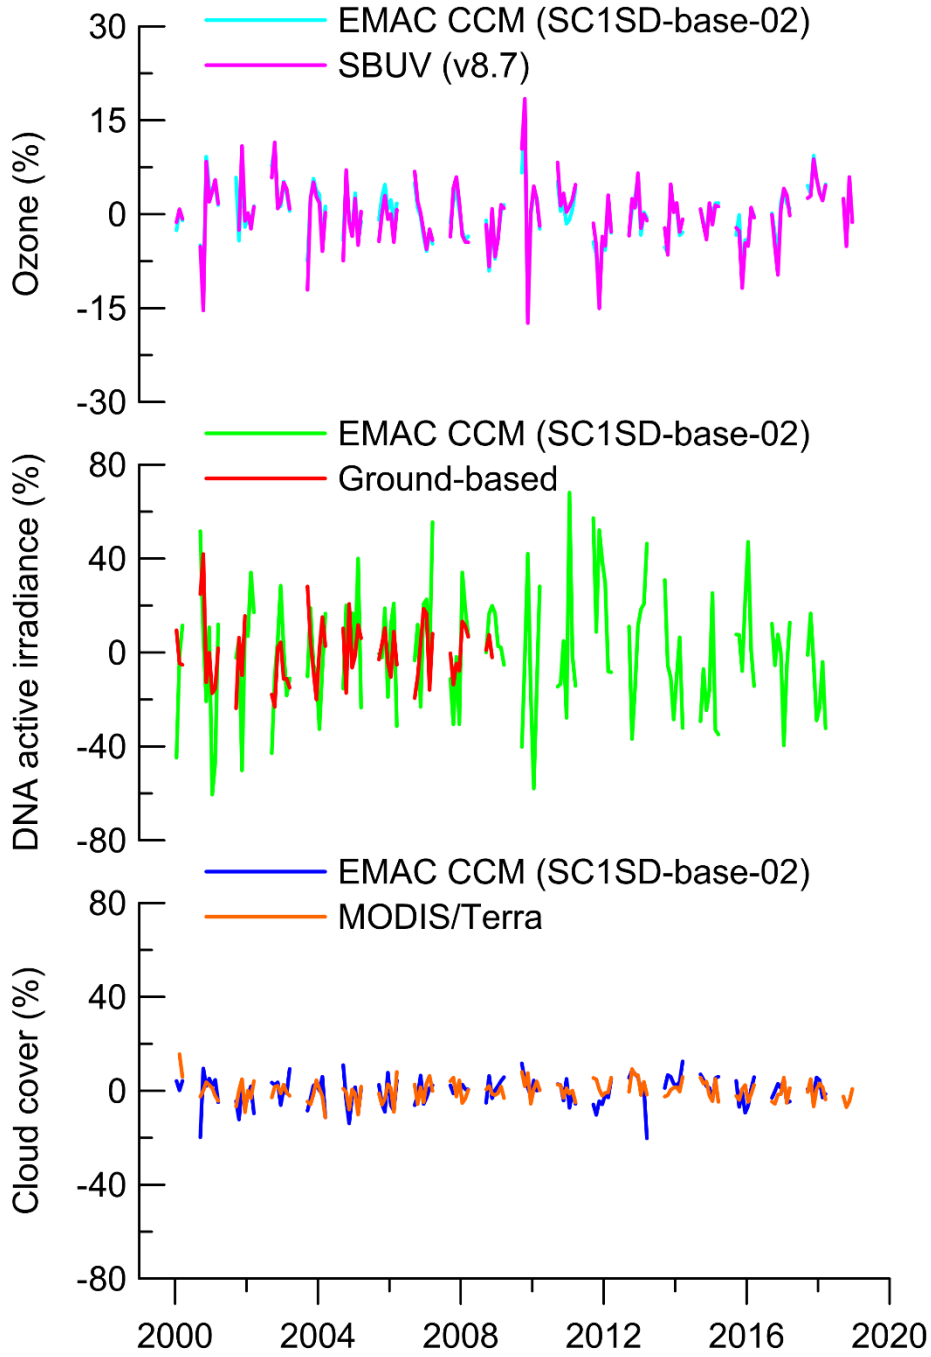

# Palmer, Antarctica

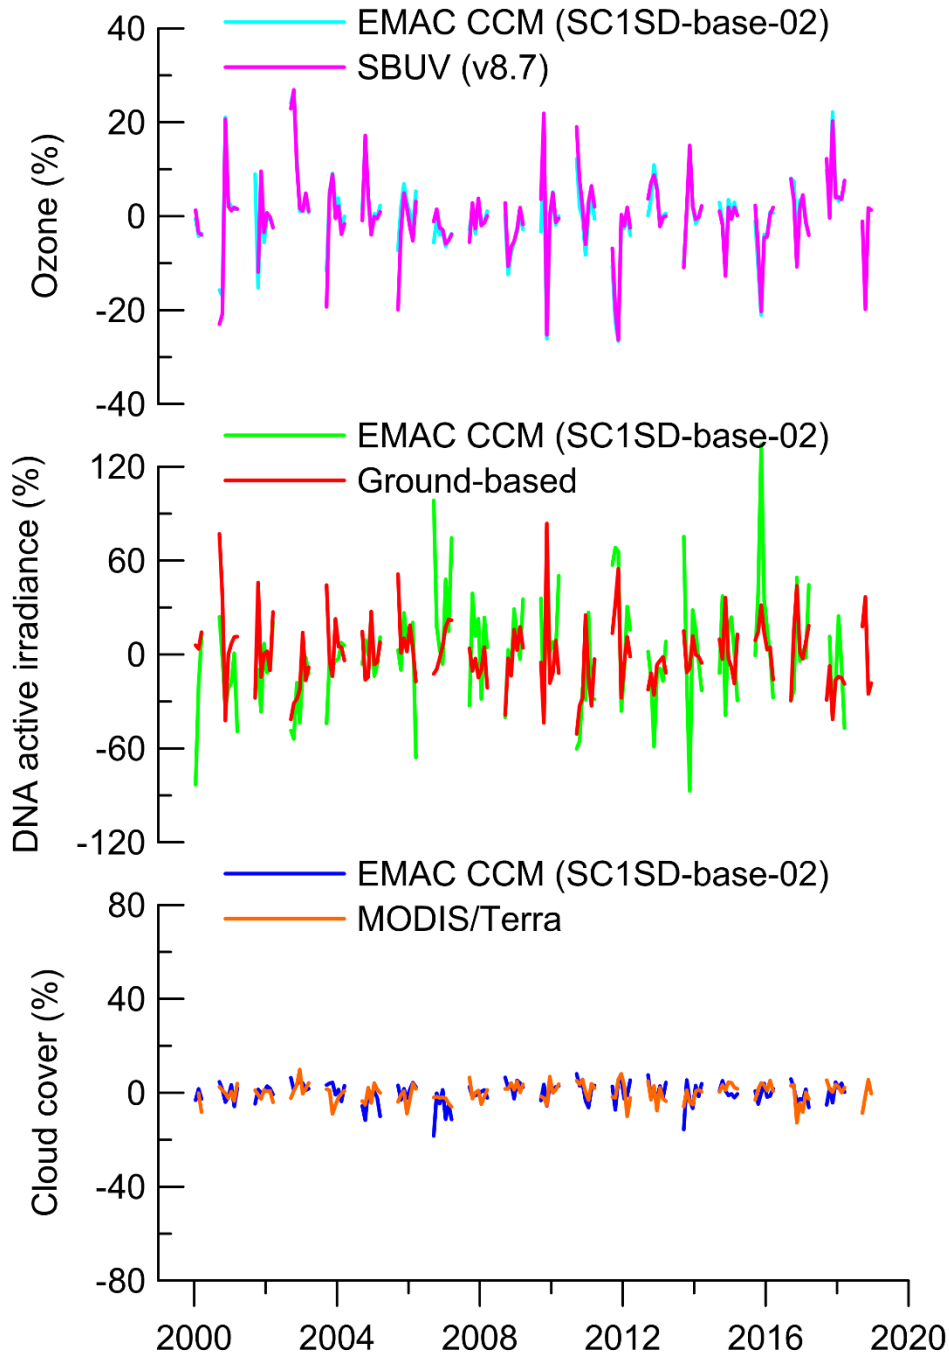

# Arrival Heights, Antarctica

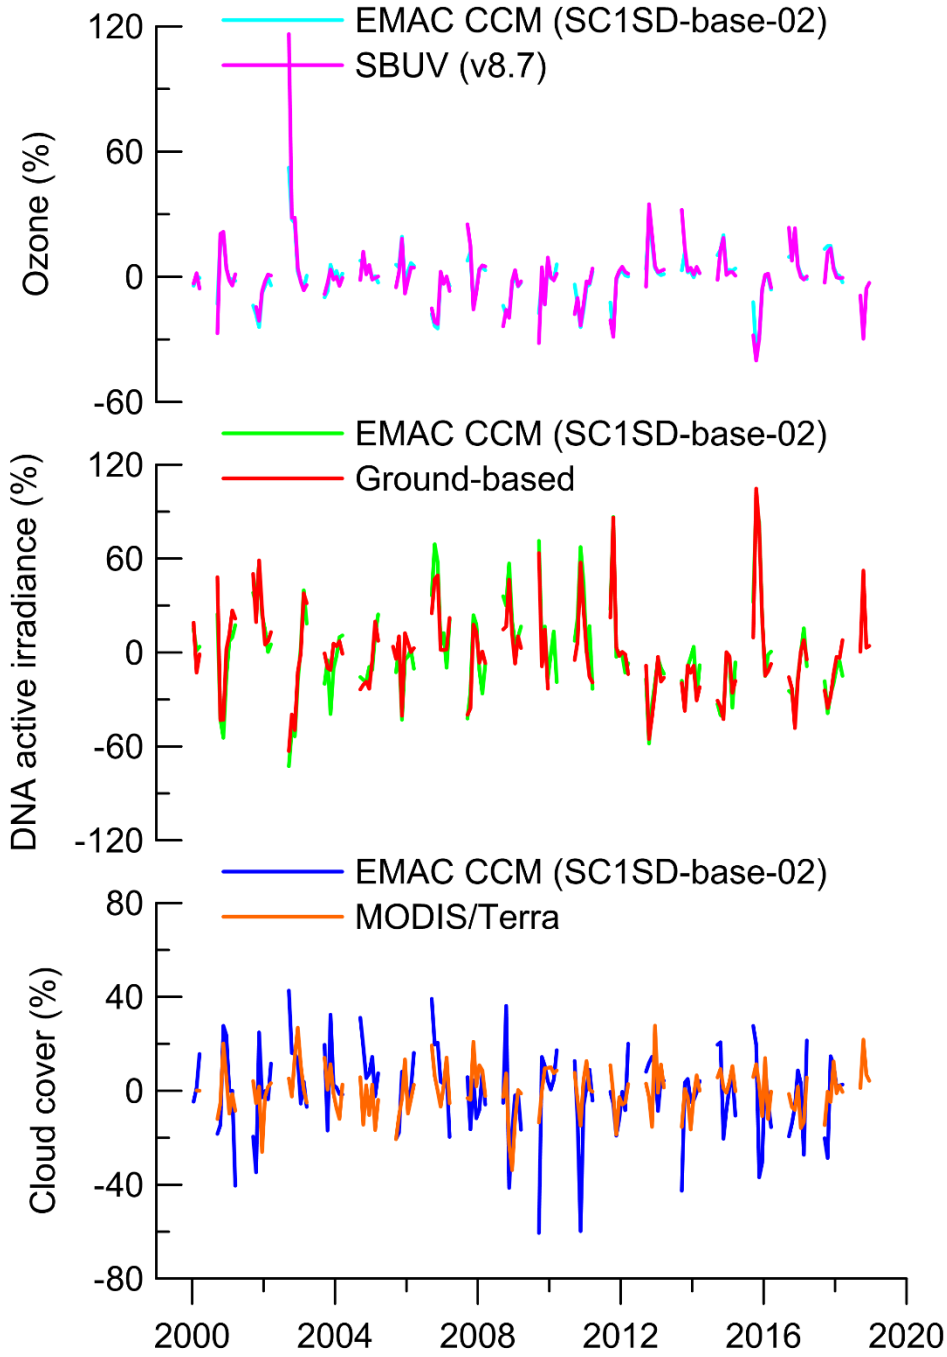

# South Pole, Antarctica

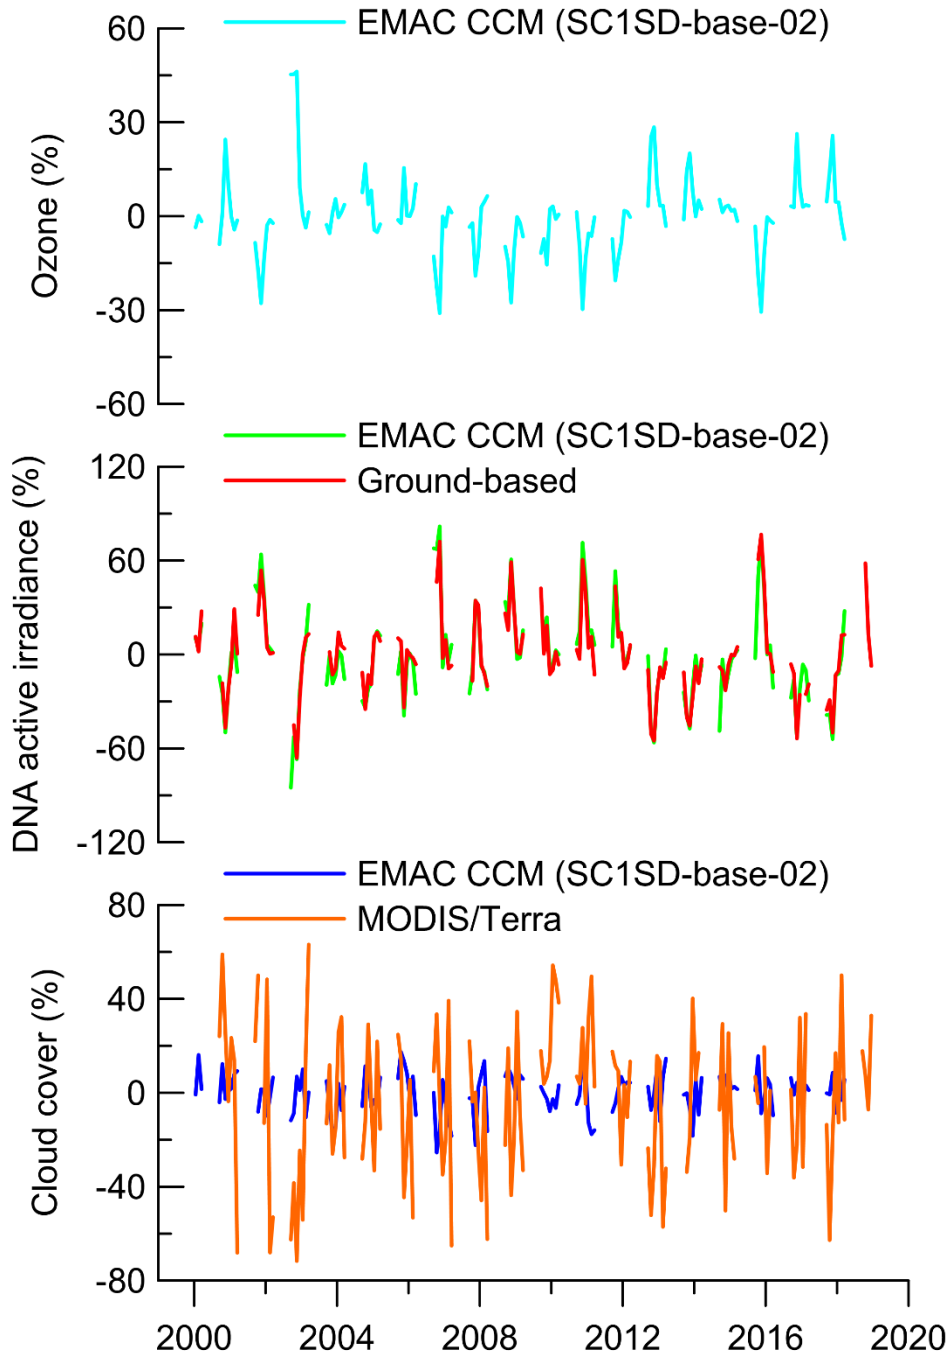

Supplement: Supplementary file 1 [file egusphere-2022-87-supplement.pdf]
